# Supplementary material
Source: PubMed Central journal article supplement (PMC4373976)
Supplement: NIHMS668604-supplement-01.pdf [file NIHMS668604-supplement-01.pdf]

## Supplementary Information

*In vivo* gold nanoparticle delivery of peptide vaccine induces anti-tumor immune response in prophylactic and therapeutic tumor models

*Joao Paulo Mattos Almeida<sup>†</sup>, Adam Yuh Lin<sup>†</sup>, Elizabeth Raquel Figueroa<sup>†</sup>, Aaron Edward Foster<sup>‡, #</sup>, and Rebekah Anna Drezek<sup>‡, \*</sup>*

<sup>†</sup> Department of Bioengineering, Rice University, Houston, Texas, USA.

<sup>#</sup> Bellicum Pharmaceuticals, Houston, Texas, USA.

Keywords: Gold nanoparticles, Immunotherapy, Biodistribution, Immune system, Cancer.

<sup>‡</sup> **Authors contributed equally.**

**\*Author for correspondence: [drezek@rice.edu](mailto:drezek@rice.edu) or [afoster@bellicum.com](mailto:afoster@bellicum.com)**

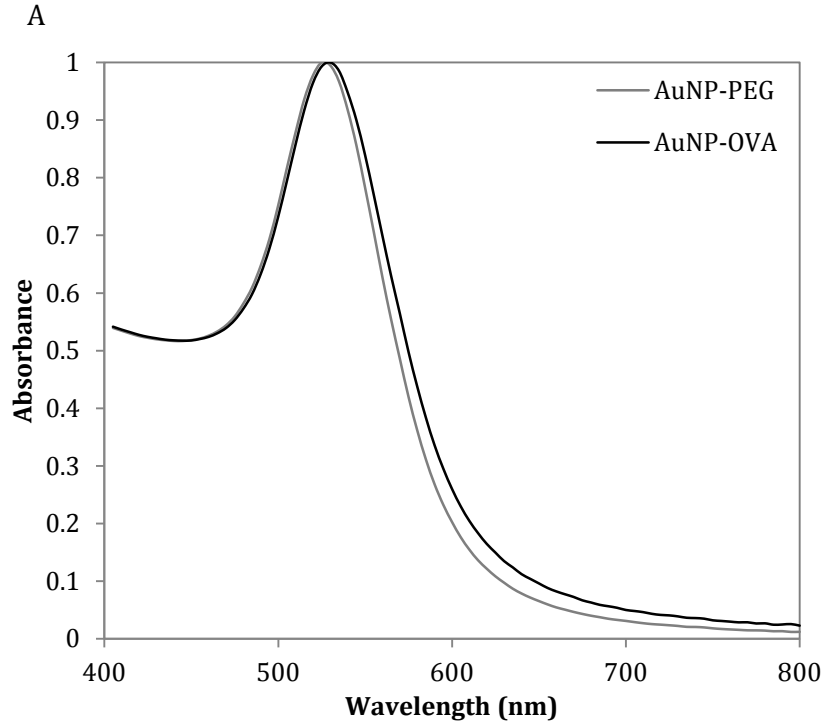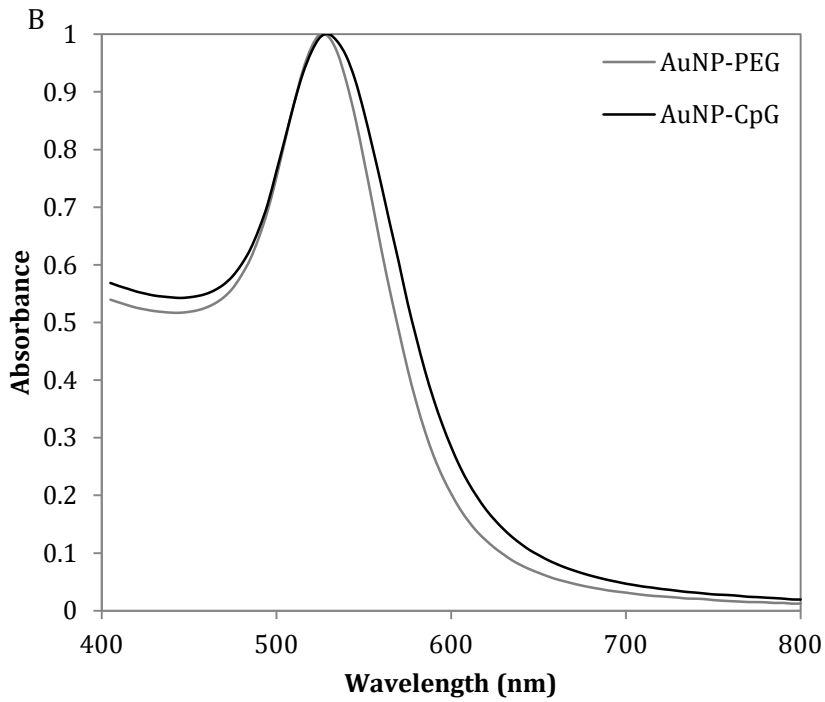

**Supplementary Figure 1.** Absorbance spectra of A) AuNP-PEG and AuNP-OVA particles. B) AuNP-PEG and AuNP-CpG particles.

| Particle | Mean hydrodynamic diameter | Polydispersity |
|----------|----------------------------|----------------|
| AuNP-PEG | 60.3 +/- 0.2               | 0.232          |
| AuNP-OVA | 84.3 +/- 0.9               | 0.285          |
| AuNP-CpG | 83.3 +/- 0.4               | 0.292          |

**Supplementary Table 1.** Size and polydispersity of nanoparticles.

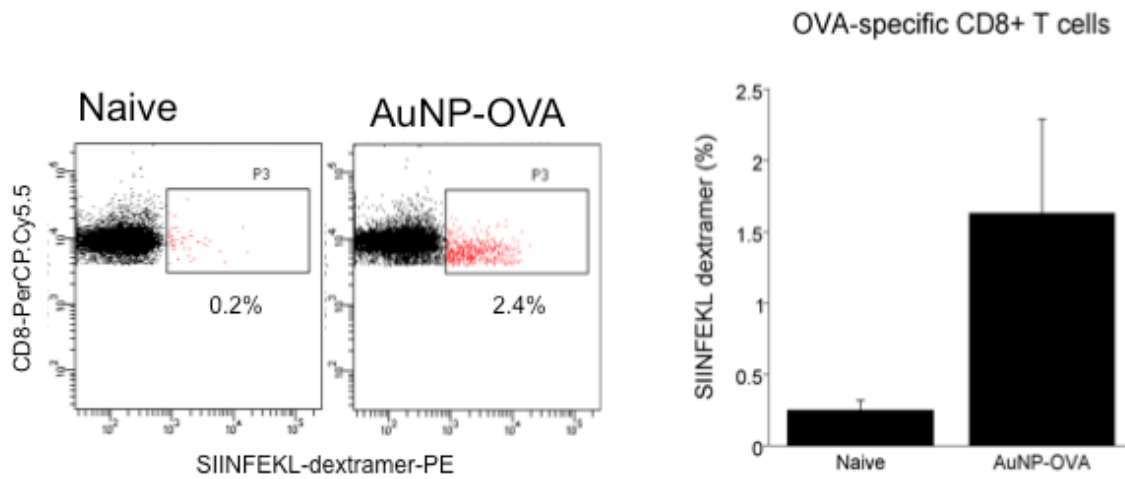

**Supplemental Figure 2.** Dextramer analysis of CD8<sup>+</sup> T cells positive for OVA in naïve and AuNP-OVA treated mice.

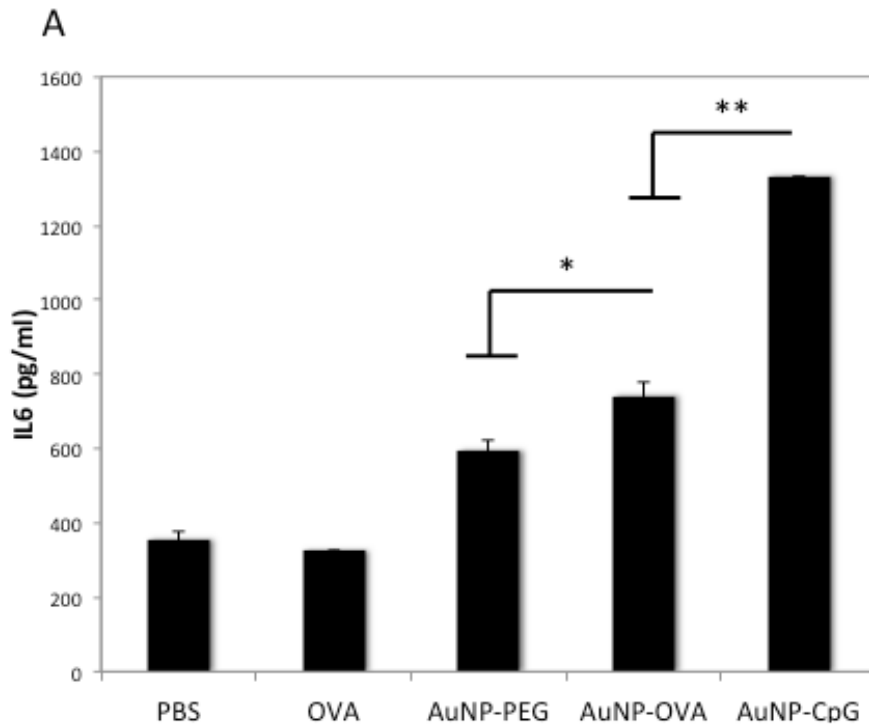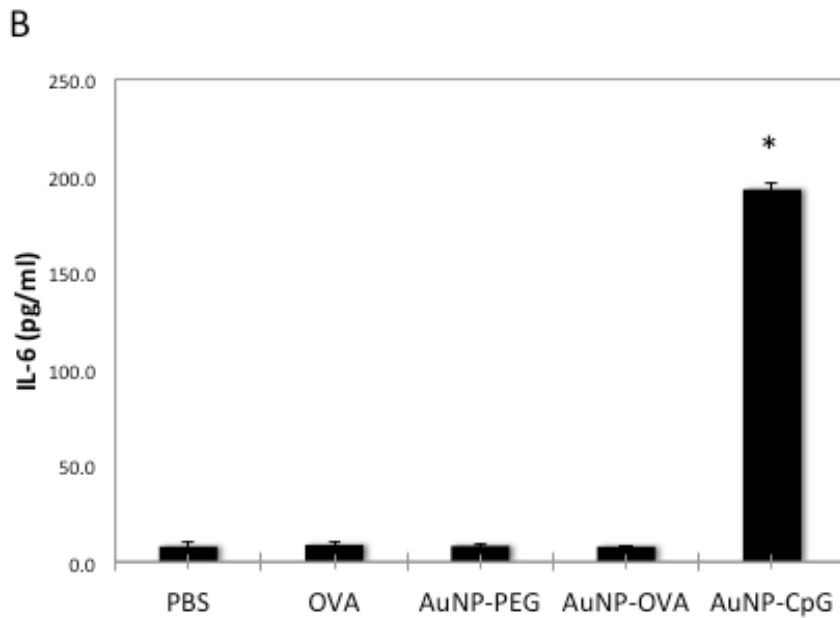

**Supplementary Figure 3.** IL-6 production in A) Bone Marrow Dendritic Cells (BMDCs) or B) J774.A1 monocyte/macrophage cell line exposed to PBS, 50  $\mu$ g OVA,  $2 \times 10^{11}$  AuNP-PEG particles per ml,  $2 \times 10^{11}$  AuNP-OVA particles per ml, or  $2 \times 10^{11}$  AuNP-CpG per ml. \*,  $p < 0.008$ . \*\*,  $p < 0.0001$ .
